# Supplementary material for: The Effect of Nutrition Intervention with Oral Nutritional Supplements on Pancreatic and Bile Duct Cancer Patients Undergoing Chemotherapy
Source: MDPI journal article supplement (doi:10.3390/nu11051145), 2019-05-22
Supplement: s1 [file s1]

**Supplementary table S1.** Cancer progression of ONS and Non-ONS subjects over the study period (8 weeks).

| Cancer progression <sup>a</sup> | ONS (n=15) | Non-ONS (n=19) |
|---------------------------------|------------|----------------|
| Complete remission              | 0(0)       | 0(0)           |
| Partial remission               | 2(13.3)    | 1(6.7)         |
| Stable disease                  | 10(66.7)   | 14(93.3)       |
| Progressive disease             | 3(20.0)    | 4(26.7)        |

<sup>a</sup>n(%). All cancer progression represents the change of cancer volume before and after chemotherapy. *Complete remission* complete eradication of cancer; *Partial remission* decreased cancer volume to 50% or more; *Stable disease* decreased cancer volume to less than 50% or increased cancer to less than 120%; *Progressive disease* increased cancer volume to 125% or more despite chemotherapy.

**Supplementary table S2** Comparison of meal and snack intake between the ONS (n=15) and Non-ONS (n=19) groups during the study period (8 weeks).

| Variables                            |                  |    | ONS (n=15)    | Non-ONS (n=19) | p <sup>2)</sup> |
|--------------------------------------|------------------|----|---------------|----------------|-----------------|
| <b>Meal</b>                          | Energy (kcal)    | 0w | 1224.20±88.3  | 1198.33±116.2  | 0.918           |
|                                      |                  | 8w | 1311.57±82.5  | 1306.5±124.7   | 0.973           |
|                                      | Protein (g)      | 0w | 50.27±6.6     | 55.38±6.1      | 0.607           |
|                                      |                  | 8w | 65.98±5.5     | 70.39±8.14     | 0.918           |
|                                      | Carbohydrate (g) | 0w | 199.61±21.0   | 175.60±16.6    | 0.706           |
|                                      |                  | 8w | 189.97±11.4   | 173.10±15.5    | 0.607           |
|                                      | Fat (g)          | 0w | 32.70±4.7     | 32.31±4.5      | 0.784           |
|                                      |                  | 8w | 32.90±4.6     | 37.65±5.2      | 0.706           |
| <b>Snack<br/>(including<br/>ONS)</b> | Energy (kcal)    | 0w | 263.87±48.3   | 273.87±53.9    | 0.973           |
|                                      |                  | 8w | 649.32±41.7** | 438.86±56.7*   | 0.006§§         |
|                                      | Protein (g)      | 0w | 13.82±5.6     | 8.65±1.8       | 0.918           |
|                                      |                  | 8w | 25.88±2.5**   | 13.58±1.8**    | 0.071           |
|                                      | Carbohydrate (g) | 0w | 48.31±9.4     | 45.96±7.6      | 0.918           |
|                                      |                  | 8w | 105.67±6.4**  | 77.53±10.1     | 0.000§§§        |
|                                      | Fat (g)          | 0w | 5.90±1.2      | 8.19±2.4       | 0.656           |
|                                      |                  | 8w | 17.12±1.3*    | 11.03±1.6      | 0.000§§§        |

<sup>1)</sup> Mean±SE <sup>2)</sup> Statistical difference between ONS group and Non-ONS group derived from Mann-Whitney test (§:  $p < 0.05$ , §§:  $p < 0.01$ , §§§:  $p < 0.001$ )

\*Significant difference between baseline and 8w obtained by Wilcoxon signed rank test (\*:  $p < 0.05$ , \*\*:  $p < 0.01$ , \*\*\*:  $p < 0.001$ )
